# Supplementary material for: Development of a Method for Simultaneous Analysis of Allergenic Flavoring Agents in Cigarettes and Quantitative Risk Assessment for Consumer Safety
Source: MDPI journal article supplement (doi:10.3390/toxics9040087), 2021-04-18
Supplement: s1 [file s1]

# Supplementary Materials: Development of A Method for Simultaneous Analysis of Allergenic Flavoring Agents in Cigarettes and Quantitative Risk assessment for Consumer Safety

Dae Yong Jang, Hyung Soo Kim, Eun Chul Pack, Ye Ji Koo, Kyung Min Lim and Dal Woong Choi

Table S1. Non-capsule cigarettes and capsule cigarettes selected for analysis.

| No. | Brand | Category    | Cigarette Size | Number of Capsules        | Sub-Brand       | Flavor Type |
|-----|-------|-------------|----------------|---------------------------|-----------------|-------------|
| 1   | A     | Non-capsule | King           | None                      | Plus            | -           |
| 2   |       |             | King           | None                      | Origin          | -           |
| 3   |       | Capsule     | King           | 1 EA                      | Ice Kula        | Mint        |
| 4   |       |             | King           | 1 EA                      | Rula            | Banana      |
| 5   |       |             | King           | 1 EA (Random, 1 out of 5) | Mola            | Fruit       |
| 6   |       |             | King           | 1 EA                      | Ice Jack        | Mint        |
| 7   | B     | Non-capsule | Slim           | None                      | Prime           | -           |
| 8   |       |             | Slim           | None                      | Soo 0.1         | -           |
| 9   |       |             | Slim           | None                      | Soo             | -           |
| 10  |       |             | Slim           | None                      | Sense 1         | -           |
| 11  |       |             | Slim           | None                      | One             | -           |
| 12  |       |             | Slim           | None                      | Classic         | -           |
| 13  |       | Capsule     | Slim           | 1 EA                      | Change 1mg      | Mint        |
| 14  |       |             | Slim           | 1 EA                      | Change W        | Wine        |
| 15  |       |             | Slim           | 1 EA                      | Change Up       | Orange      |
| 16  |       |             | Slim           | 1 EA                      | Change LiNN     | Mint        |
| 17  |       |             | Slim           | 1 EA                      | Change Bing     | Sweet       |
| 18  |       |             | Slim           | 1 EA                      | Change Frozen   | Mint        |
| 19  |       |             | Slim           | 1 EA                      | Change Himalaya | Mint        |
| 20  |       |             | Slim           | 1 EA (Random, 1 out of 5) | Change Secret   | Fruit       |
| 21  |       |             | Slim           | 1 EA                      | Change 4mg      | Mint        |
| 22  | C     | Non-capsule | King           | None                      | Gold            | -           |
| 23  |       |             | King           | None                      | Silver          | -           |
| 24  |       |             | King           | None                      | Medium          | -           |
| 25  |       |             | King           | None                      | Red             | -           |
| 26  |       | Capsule     | King           | 1 EA                      | Hybrid 1        | Mint        |
| 27  |       |             | King           | 1 EA                      | Ice Blast One   | Mint        |

|                                               |   |             |      |      |                                 |                    |
|-----------------------------------------------|---|-------------|------|------|---------------------------------|--------------------|
| 28                                            |   |             | King | 1 EA | Hybrid 5                        | Mint               |
| 29                                            |   |             | King | 2 EA | Zing Fusion Double              | Orange             |
| 30                                            |   |             | King | 1 EA | Ice Blast                       | Mint               |
| 31                                            | D | Non-capsule | King | None | 6mg                             | -                  |
| 32                                            |   |             | Slim | None | Fine Cut Master 1mg             | -                  |
| 33                                            |   |             | Slim | None | Fine Cut Master 3mg             | -                  |
| 34                                            |   |             | King | None | 1mg                             | -                  |
| 35                                            |   |             | Slim | None | Fine Cut 1mg                    | -                  |
| 36                                            |   |             | King | None | 3mg                             | -                  |
| 37                                            |   | Capsule     | King | 1 EA | Switch one                      | Mint               |
| 38                                            |   |             | Slim | 1 EA | Fine Cut Switch                 | Mint               |
| 39                                            |   |             | Slim | 2 EA | Fine Cut Mellow Crush           | Mellon, Mint       |
| 40                                            |   |             | Slim | 2 EA | Fine Cut Tropical Crush         | Pineapple, Mint    |
| 41                                            |   |             | King | 2 EA | Summer Crush                    | Watermelon, Orange |
| 42                                            |   |             | King | 1 EA | Switch 6mg                      | Mint               |
| 43                                            | E | Non-capsule | King | None | Sky Blue                        | -                  |
| 44                                            |   |             | King | None | LSS One                         | -                  |
| 45                                            |   |             | King | None | One                             | -                  |
| 46                                            |   |             | King | None | Wind Blue                       | -                  |
| 47                                            |   |             | King | None | LSS Wind Blue                   | -                  |
| 48                                            |   |             | King | None | Original                        | -                  |
| 49                                            |   | Capsule     | King | 1 EA | LBS Yellow 1mg                  | Lemon              |
| 50                                            |   |             | King | 1 EA | LBS Blue                        | Mint               |
| 51                                            |   |             | King | 1 EA | LBS Mix Green                   | Fruit              |
| 52                                            |   |             | King | 1 EA | LBS Yellow 3mg                  | Lemon              |
| 53                                            |   |             | King | 1 EA | LBS Tropical Mix                | Melon, Mint        |
| 54                                            |   |             | King | 1 EA | LBS Purple                      | Grape              |
| Blank                                         | C | Non-capsule | Slim | None | Zero Additive                   | -                  |
| Total number of tobacco or filter tips: 55 EA |   |             |      |      | Total number of capsules: 42 EA |                    |

Table S2. Optimized GC-MS/MS conditions for analyzing flavoring agents in cigarettes.

| Compound                       | Retention Time (min) | SRM Transition 1   |                   |                  | SRM Transition 2    |                   |                  |
|--------------------------------|----------------------|--------------------|-------------------|------------------|---------------------|-------------------|------------------|
|                                |                      | Precursor Ion(m/z) | Product Ion (m/z) | Collision Energy | Precursor Ion (m/z) | Product Ion (m/z) | Collision Energy |
| D-Limonene                     | 6.39                 | 68.1               | 53.1              | 10               | 93.1                | 77.0              | 12               |
| Linalool                       | 9.45                 | 93.1               | 77.1              | 12               | 121.1               | 93.1              | 6                |
| Methyl 2-octynoate             | 10.36                | 95.1               | 67.1              | 8                | 123.1               | 81.1              | 8                |
| Citral                         | 10.65; 11.11         | 94.1               | 79.1              | 8                | 69.1                | 41.1              | 6                |
| Citronellol                    | 11.32                | 95.1               | 67.1              | 8                | 69.1                | 41.1              | 6                |
| Geraniol                       | 12.26                | 69.1               | 41.1              | 6                | 93.1                | 77.0              | 12               |
| $\alpha$ -Isomethyl ionone     | 12.53                | 150.1              | 107.1             | 6                | 135.2               | 91.1              | 14               |
| Benzyl alcohol                 | 12.71                | 108.1              | 79.1              | 12               | 79.1                | 77.1              | 10               |
| Hydroxycitronellal             | 13.62                | 71.1               | 43.1              | 6                | 59.0                | 31.1              | 10               |
| Methyl eugenol                 | 14.89                | 178.1              | 107.1             | 14               | 163.1               | 107.1             | 6                |
| Cinnamaldehyde                 | 15.49                | 131.0              | 77.0              | 22               | 103.1               | 77.1              | 10               |
| Lilial                         | 15.72                | 189.1              | 131.1             | 10               | 204.1               | 189.2             | 8                |
| Eugenol                        | 18.83                | 164.1              | 131.1             | 10               | 131.1               | 103.1             | 10               |
| $\alpha$ -Amylcinnamaldehyde   | 22.06                | 129.1              | 128.1             | 18               | 202.1               | 129.1             | 6                |
| Anise alcohol                  | 22.84                | 138.0              | 109.1             | 6                | 137.0               | 109.0             | 6                |
| Cinnamyl alcohol               | 23.04                | 134.1              | 92.1              | 6                | 115.1               | 89.1              | 14               |
| Isoeugenol                     | 22.04; 26.45         | 164.1              | 131.0             | 10               | 149.1               | 121.1             | 6                |
| $\alpha$ -Hexylcinnamaldehyde  | 26.93                | 216.2              | 129.1             | 6                | 117.1               | 115.1             | 8                |
| Farnesol                       | 26.07; 27.31         | 81.1               | 79.2              | 10               | 93.1                | 77.1              | 10               |
| Coumarin                       | 29.08                | 118.0              | 90.1              | 10               | 146.0               | 118.1             | 10               |
| HICC                           | 29.99; 30.23         | 105.1              | 79.0              | 10               | 136.1               | 79.1              | 8                |
| $\alpha$ -Amylcinnamyl alcohol | 31.25                | 133.1              | 55.0              | 8                | 91.1                | 65.0              | 14               |
| Benzyl benzoate                | 32.16                | 105.0              | 77.1              | 12               | 91.1                | 65.1              | 12               |
| Benzyl salicylate              | 33.48                | 228.1              | 91.1              | 6                | 91.1                | 65.1              | 14               |
| Benzyl cinnamate               | 36.76                | 131.0              | 103.1             | 8                | 91.1                | 65.1              | 12               |
| Menthol                        | 10.25                | 95.1               | 67.1              | 8                | 123.1               | 81.1              | 8                |

**Table S3.** Method validation (MDL, LOQ, and linearity) for analyzing allergenic flavoring agents.

| Compound                       | LOD<br>(ng/ml) | MDL (ng/ml) |            | LOQ (ng/ml) |         |            | Calibration<br>Range (ng/ml)     | Linearity (R <sup>2</sup> ) |
|--------------------------------|----------------|-------------|------------|-------------|---------|------------|----------------------------------|-----------------------------|
|                                |                | Tobacco     | Filter tip | Capsule     | Tobacco | Filter tip |                                  |                             |
| D-Limonene                     | 3.91           | 7.81        | 3.91       | 13.03       | 26.03   | 13.03      | 13.02 - 2,000                    | 0.9999                      |
| Linalool                       | 0.49           | 0.98        | 1.95       | 1.63        | 3.27    | 6.50       | 1.63 - 125;<br>125 - 2,000       | 0.9999;<br>0.9999           |
| Methyl 2-octynoate             | 0.98           | 3.91        | 3.91       | 3.27        | 13.03   | 13.03      | 3.26 - 125                       | 0.9998                      |
| Citral                         | 0.98           | 1.95        | 0.98       | 3.27        | 6.50    | 3.27       | 3.26 - 1,000                     | 0.9999                      |
| Citronellol                    | 3.91           | 3.91        | 3.91       | 13.03       | 13.03   | 13.03      | 13.02 - 2,000                    | 0.9999                      |
| Geraniol                       | 1.95           | 3.91        | 3.91       | 6.50        | 13.03   | 13.03      | 6.51 - 62.5;<br>62.5 - 2,000     | 0.9998;<br>0.9997           |
| $\alpha$ -Isomethyl ionone     | 0.24           | 0.49        | 3.91       | 0.80        | 1.63    | 13.03      | 0.81 - 125                       | 0.9999                      |
| Benzyl alcohol                 | 0.98           | 1.95        | 3.91       | 3.27        | 6.50    | 13.03      | 3.26 - 2,000                     | 0.9999                      |
| Hydroxycitronellal             | 3.91           | 3.91        | 3.91       | 13.03       | 13.03   | 13.03      | 13.02 - 250                      | 0.9996                      |
| Methyl eugenol                 | 0.24           | 1.95        | 0.98       | 0.80        | 6.50    | 3.27       | 0.81 - 125                       | 0.9999                      |
| Cinnamaldehyde                 | 0.24           | 0.49        | 0.49       | 0.80        | 1.63    | 1.63       | 0.81 - 125                       | 0.9999                      |
| Lilial                         | 0.12           | 0.49        | 0.98       | 0.40        | 1.63    | 3.27       | 0.41 - 62.5                      | 0.9998                      |
| Eugenol                        | 0.98           | 0.98        | 3.91       | 3.27        | 3.27    | 13.03      | 3.26 - 250                       | 0.9999                      |
| $\alpha$ -Amylcinnamaldehyde   | 0.98           | 0.98        | 1.95       | 3.27        | 3.27    | 6.50       | 3.26 - 125                       | 0.9999                      |
| Anise alcohol                  | 1.95           | 1.95        | 1.95       | 6.50        | 6.50    | 6.50       | 6.51 - 500                       | 0.9999                      |
| Cinnamyl alcohol               | 0.49           | 0.98        | 0.49       | 1.63        | 3.27    | 1.63       | 1.63 - 250                       | 0.9998                      |
| Isoeugenol                     | 1.82           | 1.82        | 1.82       | 6.07        | 6.07    | 6.07       | 6.08 - 116.75                    | 0.9999                      |
| $\alpha$ -Hexylcinnamaldehyde  | 0.98           | 0.98        | 0.98       | 3.27        | 3.27    | 3.27       | 3.26 - 125                       | 0.9997                      |
| Farnesol                       | 5.59           | 5.59        | 5.59       | 18.63       | 18.63   | 18.63      | 18.62 - 179                      | 0.9999                      |
| Coumarin                       | 0.98           | 1.95        | 3.91       | 3.27        | 6.50    | 13.03      | 3.26 - 125                       | 0.9997                      |
| HICC                           | 0.24           | 0.98        | 1.95       | 0.80        | 3.27    | 6.50       | 0.81 - 62.5                      | 0.9998                      |
| $\alpha$ -Amylcinnamyl alcohol | 1.95           | 1.95        | 3.91       | 6.50        | 6.50    | 13.03      | 6.51 - 125                       | 0.9999                      |
| Benzyl benzoate                | 0.49           | 0.49        | 0.49       | 1.63        | 1.63    | 1.63       | 1.63 - 500                       | 0.9998                      |
| Benzyl salicylate              | 3.91           | 3.91        | 3.91       | 13.03       | 13.03   | 13.03      | 13.02 - 250                      | 0.9999                      |
| Benzyl cinnamate               | 0.49           | 2.44        | 0.98       | 1.63        | 8.13    | 3.27       | 1.63 - 125                       | 0.9999                      |
| Menthol                        | 0.49           | 0.98        | 1.95       | 1.63        | 3.27    | 6.50       | 1.63 - 156.25;<br>156.25 - 5,000 | 0.9999;<br>0.9999           |

MDL, Method detection limit; LOQ, Limit of quantitation.

**Table S4.** Recovery and reproducibility of analysis of allergenic flavoring agents in cigarette matrix.

| Compound           | Tobacco ( <i>n</i> = 3, for individual concentrations) |              |              |                         |          |         | Filter Tip ( <i>n</i> = 3, for individual concentrations) |              |              |                         |          |         |
|--------------------|--------------------------------------------------------|--------------|--------------|-------------------------|----------|---------|-----------------------------------------------------------|--------------|--------------|-------------------------|----------|---------|
|                    | Recovery (%)                                           |              |              | Reproducibility (% RSD) |          |         | Recovery (%)                                              |              |              | Reproducibility (% RSD) |          |         |
|                    | 2.5 µg/g                                               | 5.0 µg/g     | 50 µg/g      | 2.5 µg/g                | 5.0 µg/g | 50 µg/g | 2.5 µg/g                                                  | 5.0µg/g      | 50 µg/g      | 2.5 µg/g                | 5.0 µg/g | 50 µg/g |
| D-Limonene         | 94.2 (2.2%)                                            | 91.0 (4.8%)  | 93.0 (1.0%)  | 1.81                    | 3.95     | 0.81    | 92.9 (2.5%)                                               | 97.3 (2.3%)  | 93.1 (1.3%)  | 2.02                    | 1.89     | 1.03    |
| Benzyl alcohol     | 89.7 (4.8%)                                            | 101.4 (4.5%) | 92.9 (1.8%)  | 3.88                    | 3.68     | 1.49    | 94.3 (1.9%)                                               | 98.4 (2.2%)  | 93.2 (2.4%)  | 1.52                    | 1.82     | 1.96    |
| Linalool           | 95.5 (4.2%)                                            | 104.0 (0.8%) | 102.7 (0.6%) | 3.45                    | 0.68     | 0.46    | 92.9 (1.2%)                                               | 99.2 (2.8%)  | 96.8 (1.5%)  | 0.95                    | 2.31     | 1.22    |
| Methyl 2-octynoate | 89.0 (2.5%)                                            | 96.4 (1.1%)  | 106.4 (0.4%) | 2.01                    | 0.89     | 0.34    | 86.0 (6.8%)                                               | 90.6 (5.3%)  | 100.5 (1.5%) | 5.56                    | 4.35     | 1.24    |
| Citronellol        | 103.2 (4.6%)                                           | 103.2 (5.4%) | 108.3 (0.6%) | 3.73                    | 4.43     | 0.48    | 90.5 (0.7%)                                               | 99.6 (3.7%)  | 101.1 (1.6%) | 0.60                    | 3.05     | 1.32    |
| Citral             | 89.5 (5.3%)                                            | 95.9 (4.3%)  | 105.1 (2.0%) | 4.28                    | 3.49     | 1.67    | 94.4 (0.8%)                                               | 104.4 (2.1%) | 100.3 (1.7%) | 0.65                    | 1.72     | 1.40    |
| Geraniol           | 88.3 (1.8%)                                            | 98.1 (2.9%)  | 99.5 (3.1%)  | 1.45                    | 2.39     | 2.50    | 91.5 (2.1%)                                               | 97.2 (5.1%)  | 91.1 (3.0%)  | 1.72                    | 4.19     | 2.45    |
| Cinnamaldehyde     | 101.4 (8.0%)                                           | 102.6 (3.3%) | 97.9 (0.6%)  | 6.56                    | 2.71     | 0.45    | 100.1 (0.9%)                                              | 102.8 (2.7%) | 96.6 (1.4%)  | 0.70                    | 2.24     | 1.13    |
| Anise alcohol      | 91.5 (3.1%)                                            | 93.8 (4.9%)  | 90.8 (5.0%)  | 2.51                    | 3.96     | 4.11    | 87.0 (1.4%)                                               | 91.2 (4.1%)  | 97.0 (2.8%)  | 1.18                    | 3.38     | 2.28    |
| Hydroxycitronellal | 101.3 (1.8%)                                           | 103.5 (3.0%) | 105.2 (0.9%) | 1.49                    | 2.41     | 0.71    | 95.1 (1.5%)                                               | 103.3 (3.4%) | 103.8 (0.9%) | 1.20                    | 2.76     | 0.70    |
| Cinnamyl alcohol   | 89.3 (9.7%)                                            | 96.4 (5.2%)  | 99.3 (1.9%)  | 7.95                    | 4.20     | 1.55    | 94.9 (1.0%)                                               | 92.3 (2.6%)  | 96.9 (1.4%)  | 0.77                    | 2.13     | 1.12    |
| Eugenol            | 102.9 (1.6%)                                           | 105.8 (1.1%) | 101.0 (0.4%) | 1.33                    | 0.86     | 0.36    | 99.4 (2.0%)                                               | 102.8 (2.2%) | 101.9 (3.9%) | 1.66                    | 1.76     | 3.14    |
| Methyl eugenol     | 103.7 (2.7%)                                           | 104.8 (3.2%) | 101.3 (0.2%) | 2.18                    | 2.61     | 0.14    | 97.9 (4.8%)                                               | 95.9 (1.6%)  | 97.1 (1.3%)  | 3.93                    | 1.33     | 1.07    |
| Coumarin           | 102.5 (3.3%)                                           | 98.7 (5.1%)  | 101.4 (0.2%) | 2.72                    | 4.16     | 0.12    | 100.7 (2.4%)                                              | 96.9 (0.8%)  | 98.9 (0.9%)  | 1.95                    | 0.65     | 0.76    |
| Isoeugenol         | 99.9 (4.5%)                                            | 100.9 (3.1%) | 102.8 (2.0%) | 3.68                    | 2.53     | 1.62    | 95.9 (3.5%)                                               | 94.7 (1.4%)  | 91.2 (5.5%)  | 2.84                    | 1.12     | 4.50    |
| α-Isomethyl ionone | 106.6 (2.4%)                                           | 101.9 (1.8%) | 106.0 (0.3%) | 0.39                    | 1.40     | 0.69    | 101.1 (2.7%)                                              | 100.7 (2.1%) | 101.1 (1.6%) | 0.39                    | 1.40     | 0.69    |

|                                |             |              |              |      |      |      |              |              |              |      |      |      |
|--------------------------------|-------------|--------------|--------------|------|------|------|--------------|--------------|--------------|------|------|------|
| Lilial                         | 93.4 (2.2%) | 96.5 (4.1%)  | 101.2 (0.9%) | 1.80 | 3.35 | 0.73 | 102.9 (1.0%) | 95.1 (3.4%)  | 97.8 (1.4%)  | 0.83 | 2.81 | 1.12 |
| $\alpha$ -Amylcinnamaldehyde   | 87.9 (8.4%) | 100.6 (2.0%) | 98.5 (2.2%)  | 6.82 | 1.59 | 1.79 | 85.9 (2.8%)  | 97.2 (1.4%)  | 96.8 (2.1%)  | 2.27 | 1.17 | 1.68 |
| HICC                           | 95.7 (5.3%) | 101.3 (1.4%) | 104.9 (3.3%) | 4.30 | 1.13 | 2.67 | 97.3 (1.7%)  | 102.5 (5.6%) | 103.9 (1.3%) | 1.40 | 4.60 | 1.09 |
| $\alpha$ -Amylcinnamyl alcohol | 95.4 (4.3%) | 104.2 (3.3%) | 104.3 (1.5%) | 3.53 | 2.71 | 1.25 | 92.8 (2.4%)  | 98.4 (4.6%)  | 103.1 (1.8%) | 1.97 | 3.71 | 1.49 |
| Farnesol                       | 95.2 (5.6%) | 91.7 (3.2%)  | 100.4 (2.2%) | 4.55 | 2.60 | 1.75 | 94.1 (2.6%)  | 80.3 (4.6%)  | 87.7 (4.9%)  | 2.12 | 3.76 | 3.98 |
| $\alpha$ -Hexylcinnamaldehyde  | 97.7 (2.1%) | 100.6 (4.2%) | 105.4 (1.8%) | 1.71 | 3.41 | 1.45 | 95.1 (1.9%)  | 98.3 (4.1%)  | 100.8 (1.1%) | 1.55 | 3.32 | 0.92 |
| Benzyl benzoate                | 82.8 (5.7%) | 90.9 (0.7%)  | 86.0 (3.0%)  | 4.66 | 0.58 | 2.48 | 92.1 (2.0%)  | 93.4 (1.1%)  | 83.8 (1.3%)  | 1.65 | 0.87 | 1.09 |
| Benzyl salicylate              | 81.0 (3.0%) | 82.8 (3.4%)  | 104.7 (1.7%) | 2.44 | 2.74 | 1.37 | 90.2 (2.9%)  | 80.5 (3.4%)  | 97.0 (1.3%)  | 2.39 | 2.74 | 1.08 |
| Benzyl cinnamate               | 85.6 (8.4%) | 94.2 (4.8%)  | 102.6 (3.0%) | 6.87 | 3.91 | 2.48 | 87.3 (8.7%)  | 90.9 (5.8%)  | 96.1 (1.8%)  | 7.09 | 4.70 | 1.43 |

**Table S5.** Concentration (µg/g) of flavoring agents in tobacco, filter tips, and capsules.

| Compound               | Tobacco ( <i>n</i> = 54) |       |        |         |      |         | Filter tip ( <i>n</i> = 54) |         |        |         |     |          | Capsule ( <i>n</i> = 42) |          |          |          |          |           |
|------------------------|--------------------------|-------|--------|---------|------|---------|-----------------------------|---------|--------|---------|-----|----------|--------------------------|----------|----------|----------|----------|-----------|
|                        | N                        | Mean  | Median | SD      | Min  | Max     | N                           | Mean    | Median | SD      | Min | Max      | N                        | Mean     | Median   | SD       | Min      | Max       |
| D-Limonene             | 7                        | 21.0  | 9.4    | 23.9    | 1.0  | 63.2    | 11                          | 86.9    | 14.9   | 136.8   | 1.3 | 375.1    | 40                       | 18,561.9 | 1,868.8  | 25,578.1 | 20.3     | 81,795.7  |
| Linalool               | 21                       | 1.9   | 0.1    | 5.5     | 0.1  | 25.1    | 44                          | 21.7    | 0.5    | 81.3    | 0.2 | 472.0    | 41                       | 2,152.3  | 213.3    | 3,893.0  | 2.0      | 14,558.8  |
| Methyl 2-octynoate     | 0                        | -     | -      | -       | -    | -       | 0                           | -       | -      | -       | -   | -        | 0                        | -        | -        | -        | -        | -         |
| Citral                 | 54                       | 0.7   | 0.5    | 1.6     | 0.2  | 12.4    | 16                          | 88.0    | 0.7    | 331.6   | 0.4 | 1,372.1  | 29                       | 1,254.2  | 203.3    | 2,994.2  | 3.1      | 11,931.8  |
| Citronellol            | 0                        | -     | -      | -       | -    | -       | 2                           | 19.6    | 19.6   | 13.5    | 6.1 | 33.0     | 25                       | 180.6    | 22.7     | 289.4    | 12.2     | 1,237.6   |
| Geraniol               | 0                        | -     | -      | -       | -    | -       | 6                           | 13.7    | 7.3    | 12.6    | 2.8 | 36.4     | 26                       | 548.8    | 103.3    | 1,297.8  | 7.7      | 6,323.2   |
| α-Isomethyl ionone     | 12                       | 0.04  | 0.04   | 0.01    | 0.03 | 0.07    | 8                           | 0.2     | 0.2    | 0.1     | 0.1 | 0.4      | 1                        | 1.3      | 1.3      | -        | 1.3      | 1.3       |
| Benzyl alcohol         | 52                       | 5.5   | 1.3    | 10.4    | 0.2  | 55.6    | 54                          | 138.4   | 14.4   | 304.3   | 1.7 | 1,761.9  | 21                       | 2,151.7  | 11.1     | 6,544.7  | 1.8      | 23,269.9  |
| Hydroxycitronellal     | 0                        | -     | -      | -       | -    | -       | 0                           | -       | -      | -       | -   | -        | 0                        | -        | -        | -        | -        | -         |
| Methyleugenol          | 0                        | -     | -      | -       | -    | -       | 1                           | 0.3     | 0.3    | -       | 0.3 | 0.3      | 12                       | 2.9      | 1.0      | 4.3      | 0.4      | 15.0      |
| Cinnamaldehyde         | 0                        | -     | -      | -       | -    | -       | 7                           | 2.5     | 1.1    | 2.5     | 0.5 | 8.2      | 10                       | 2,035.1  | 4.3      | 3,231.1  | 0.6      | 8,523.5   |
| Lilial                 | 0                        | -     | -      | -       | -    | -       | 0                           | -       | -      | -       | -   | -        | 0                        | -        | -        | -        | -        | -         |
| Eugenol                | 4                        | 0.2   | 0.2    | 0.1     | 0.1  | 0.4     | 1                           | 8.9     | 8.9    | -       | 8.9 | 8.9      | 27                       | 13.6     | 14.4     | 7.7      | 1.6      | 34.8      |
| α-Amylcinnamaldehyde   | 0                        | -     | -      | -       | -    | -       | 0                           | -       | -      | -       | -   | -        | 0                        | -        | -        | -        | -        | -         |
| Anise alcohol          | 4                        | 0.8   | 0.5    | 0.6     | 0.4  | 1.8     | 2                           | 4.8     | 4.8    | 1.1     | 3.7 | 6.0      | 0                        | -        | -        | -        | -        | -         |
| Cinnamyl alcohol       | 0                        | -     | -      | -       | -    | -       | 0                           | -       | -      | -       | -   | -        | 3                        | 11.5     | 14.4     | 6.0      | 3.1      | 16.9      |
| Isoeugenol             | 5                        | 0.6   | 0.4    | 0.3     | 0.3  | 1.1     | 0                           | -       | -      | -       | -   | -        | 5                        | 17.3     | 3.1      | 19.9     | 0.8      | 48.2      |
| α-Hexylcinnamaldehyde  | 0                        | -     | -      | -       | -    | -       | 0                           | -       | -      | -       | -   | -        | 0                        | -        | -        | -        | -        | -         |
| Farnesol               | 0                        | -     | -      | -       | -    | -       | 0                           | -       | -      | -       | -   | -        | 2                        | 10.6     | 10.6     | 0.2      | 10.4     | 10.8      |
| Coumarin               | 0                        | -     | -      | -       | -    | -       | 0                           | -       | -      | -       | -   | -        | 0                        | -        | -        | -        | -        | -         |
| HICC                   | 0                        | -     | -      | -       | -    | -       | 0                           | -       | -      | -       | -   | -        | 0                        | -        | -        | -        | -        | -         |
| α-Amylcinnamyl alcohol | 0                        | -     | -      | -       | -    | -       | 0                           | -       | -      | -       | -   | -        | 0                        | -        | -        | -        | -        | -         |
| Benzyl benzoate        | 31                       | 0.7   | 0.1    | 1.8     | 0.1  | 8.1     | 9                           | 1.3     | 0.6    | 1.1     | 0.3 | 3.7      | 7                        | 14.8     | 6.8      | 12.7     | 1.6      | 36.5      |
| Benzyl salicylate      | 2                        | 0.9   | 0.9    | 0.1     | 0.7  | 1.0     | 0                           | -       | -      | -       | -   | -        | 0                        | -        | -        | -        | -        | -         |
| Benzyl cinnamate       | 0                        | -     | -      | -       | -    | -       | 1                           | 8.6     | 8.6    | -       | 8.6 | 8.6      | 6                        | 145.7    | 2.9      | 203.1    | 0.9      | 439.2     |
| Menthol                | 53                       | 463.8 | 2.4    | 1,211.4 | 0.1  | 5,949.5 | 53                          | 3,633.5 | 17.6   | 7,678.9 | 1.2 | 31,006.5 | 42                       | 98,948.6 | 96,829.4 | 31,755.3 | 42,307.9 | 168,826.6 |

*n*, The number of total samples; N, The number of sample containing flavoring agent; SD, Standard deviation.
